# Supplementary material
Source: PubMed Central journal article supplement (PMC4724194)
Supplement: NIHMS751894-supplement-Supplemental_Material.pdf [file NIHMS751894-supplement-Supplemental_Material.pdf]

**Joint Effects of Ambient Air Pollutants on Pediatric Asthma Emergency Department Visits in Atlanta,  
1998-2004**

Andrea Winquist, Ellen Kirrane, Mitch Klein, Matthew Strickland, Lyndsey A. Darrow, Stefanie Sarnat,  
Katherine Gass, James Mulholland, Armistead Russell, Paige Tolbert

**Supplemental Material**

## Model Details

The joint effect models for estimating the joint effects of  $p$  pollutants, without interactions, had the following form:

$$\begin{aligned}
 \text{Log}[E(Y)] = & \alpha + \sum_{i=1}^p \beta_i (\text{pollutant})_i & (1) \\
 & + \lambda[\log(\text{non} - \text{asthma pediatric resp ED visits})] + g(\gamma_1, \dots, \gamma_N; \text{day of season}) \\
 & + g(\delta_1, \dots, \delta_N; \text{dewpt}) + g(\eta_1, \dots, \eta_N; \text{min temp}) + \sum_j \xi_j (\text{year})_j \\
 & + \sum_k \nu_k (\text{month})_k + \sum_l \zeta_l (\text{day of week or holiday})_l + \sum_m \varphi_m (\text{hospital})_m \\
 & + \sum_n \tau_n (\text{max temp } ^\circ\text{C})_n + \sum_{jk} \psi_{jk} (\text{year})_j (\text{month})_k \\
 & + \sum_{kn} \omega_{kn} (\text{month})_k (\text{max temp } ^\circ\text{C})_n \\
 & + \sum_{kl} \vartheta_{kl} (\text{month})_k (\text{day of week or holiday})_l
 \end{aligned}$$

The dependent variable (Y) was the hospital-specific number of daily pediatric asthma ED visits. Analyses used the three-day moving average of pollutant concentrations (the average of the pollutant concentration on a given day (lag 0) and the previous two days (lags 1 and 2)) (*pollutant*), which was modeled as a linear term in our primary models. Models included a linear term for the logarithm of the daily number of non-asthma pediatric ED visits for acute upper respiratory infections (*non-asthma pediatric resp ED visits*); cubic polynomials ( $g$ ) for day-of-season, the moving average of dew point (lags 0-2) (*dewpt*), and the moving average of minimum temperature (lags 1 and 2) (*min temp*); indicator variables for year, month, day of week or holiday (with holidays having a separate indicator), hospital and same-day (lag 0) maximum temperature (for each degree Celsius) (*max temp °C*); and interaction terms between month and year, month and lag 0 maximum temperature, and month and day of week.

Joint effects were calculated for an interquartile-range (IQR) increment in each pollutant concentration, as the exponentiated sum (across the pollutants in the combination) of the product of each pollutant's model coefficient and that pollutant's IQR, using the following formulas:

$$\mathbf{L}'\boldsymbol{\beta} = \sum_{i=1}^p \beta_i (\text{pollutant IQR})_i \quad (2)$$

$$RR_{JE} = \exp[\mathbf{L}'\boldsymbol{\beta}] \quad (3)$$

where the joint effect of  $p$  pollutants ( $i=1, 2, \dots, p$ ) is represented by  $RR_{JE}$ ,  $\beta_i$  is the coefficient for a given pollutant ( $i$ ) from equation 1 above,  $\boldsymbol{\beta}$  is the vector of pollutant parameter estimates, and  $\mathbf{L}$  is the corresponding vector of pollutant IQRs. The 95% confidence interval for the joint effect was calculated (using an "estimate" statement in the SAS "genmod" procedure), according to the following formula:

$$se_{L'\beta} = \sqrt{\mathbf{L}'\hat{\boldsymbol{\Sigma}}\mathbf{L}} \quad (4)$$

$$95\% CI_{RR_{JE}} = (\exp(\mathbf{L}'\boldsymbol{\beta} - z_{1-\alpha/2}se_{L'\beta}), \exp(\mathbf{L}'\boldsymbol{\beta} + z_{1-\alpha/2}se_{L'\beta})) \quad (5)$$

Where  $\hat{\boldsymbol{\Sigma}}$  is the estimated covariance matrix of the estimates and  $\alpha = 0.05$ .

The joint effect models for estimating the joint effects of  $p$  pollutants with interactions had the following form:

$$\begin{aligned}
\text{Log}[E(Y)] = & \alpha + \sum_{i=1}^p \beta_i (\text{pollutant})_i + \sum_{i=2}^p \sum_{q=1}^{i-1} \beta_{iq} (\text{pollutant})_i * (\text{pollutant})_q & (6) \\
& + \lambda[\log(\text{non} - \text{asthma pediatric resp ED visits})] + g(\gamma_1, \dots, \gamma_N; \text{day of season}) \\
& + g(\delta_1, \dots, \delta_N; \text{dewpt}) + g(\eta_1, \dots, \eta_N; \text{min temp}) + \sum_j \xi_j (\text{year})_j \\
& + \sum_k \nu_k (\text{month})_k + \sum_l \zeta_l (\text{day of week or holiday})_l + \sum_m \varphi_m (\text{hospital})_m \\
& + \sum_n \tau_n (\text{max temp } ^\circ\text{C})_n + \sum_{jk} \psi_{jk} (\text{year})_j (\text{month})_k \\
& + \sum_{kn} \omega_{kn} (\text{month})_k (\text{max temp } ^\circ\text{C})_n \\
& + \sum_{kl} \vartheta_{kl} (\text{month})_k (\text{day of week or holiday})_l
\end{aligned}$$

Joint effects for the interaction models were calculated for an increment equal in magnitude to the interquartile-range (IQR) for each pollutant concentration, starting at each pollutant's 15<sup>th</sup>, 25<sup>th</sup>, or 35<sup>th</sup> percentile levels. For joint effects including interactions, the joint effect was calculated as the exponentiated sum (across the pollutants in the combination and their first-order interactions) of 1) the product of each pollutant's model coefficient and that pollutant's IQR, and 2) the product of the coefficient for each interaction term and the difference in the products of the specific pollutant levels being contrasted (represented by  $a$  and  $b$  in equation 7 below, where  $b=a+\text{IQR}$ ), using the following formulas:

$$\mathbf{L}'\boldsymbol{\beta} = \sum_{i=1}^p \beta_i (\text{pollutant IQR})_i + \sum_{i=2}^p \sum_{q=1}^{i-1} \beta_{iq} [(b_i * b_q) - (a_i * a_q)] \quad (7)$$

$$RR_{JE} = \exp[\mathbf{L}'\boldsymbol{\beta}] \quad (8)$$

where the joint effect of  $p$  pollutants ( $i=1, 2, \dots, p$ ) is represented by  $RR_{JE}$ ,  $\beta_i$  is the coefficient for a given pollutant ( $i$ ) from equation 6 above,  $\beta_{iq}$  is the coefficient for the interaction term for a given pollutant pair,  $\boldsymbol{\beta}$  is the vector of parameter estimates including estimates for pollutant  $s$  and interaction terms, and  $\mathbf{L}$  is the corresponding vector of pollutant IQRs (for pollutant betas) or differences in the product of contrasted pollutant levels (for interaction term betas). As in the no-interaction model, the 95% confidence interval for the joint effect was calculated (using an “estimate” statement in the SAS “genmod” procedure), according to the following formula:

$$se_{L'\boldsymbol{\beta}} = \sqrt{\mathbf{L}'\hat{\boldsymbol{\Sigma}}\mathbf{L}} \quad (9)$$

$$95\% CI_{RR_{JE}} = (\exp(\mathbf{L}'\boldsymbol{\beta} - z_{1-\alpha/2}se_{L'\boldsymbol{\beta}}), \exp(\mathbf{L}'\boldsymbol{\beta} + z_{1-\alpha/2}se_{L'\boldsymbol{\beta}})) \quad (10)$$

Where  $\hat{\boldsymbol{\Sigma}}$  is the estimated covariance matrix of the estimates and  $\alpha = 0.05$ .

Models used for estimating joint effects that included quadratic and cubic pollutant terms were similar to the model shown in equation 6 above except that quadratic and cubic terms for each pollutant were added to the model rather than interaction terms. The joint effect from these models was calculated as the exponentiated sum (across the pollutants in the combination and their quadratic and cubic terms) of 1) the product of each pollutant’s model coefficient and that pollutant’s IQR, and 2) the product of the coefficient for each quadratic and cubic term and the corresponding difference in the squared or cubed pollutant values for the specific pollutant levels being contrasted, in a manner similar to that shown in equation 7 above.

**eTable 1. Percentage of warm and cold season days with all pollutants in various quartiles of their respective year-round distributions,<sup>a</sup> Atlanta, 1998-2004**

| Combination                                                                                          | Season | All Quartile<br>1 | All Quartile<br>2 | All Quartile<br>3 | All Quartile<br>4 | All not in same<br>quartile |
|------------------------------------------------------------------------------------------------------|--------|-------------------|-------------------|-------------------|-------------------|-----------------------------|
| Oxidant Gases<br>(O <sub>3</sub> , NO <sub>2</sub> , SO <sub>2</sub> )                               | WARM   | 3.6%              | 1.3%              | 1.3%              | 4.8%              | 89.0%                       |
| Secondary<br>(O <sub>3</sub> , Secondary PM <sub>2.5</sub> <sup>b</sup> )                            | WARM   | 3.7%              | 5.4%              | 9.4%              | 26.4%             | 55.1%                       |
| Traffic<br>(CO, NO <sub>2</sub> , EC)                                                                | WARM   | 11.5%             | 4.6%              | 4.2%              | 10.5%             | 69.2%                       |
| Power Plant<br>(SO <sub>2</sub> , SO <sub>4</sub> <sup>2-</sup> )                                    | WARM   | 4.9%              | 4.7%              | 7.0%              | 11.2%             | 72.2%                       |
| Criteria Pollutants<br>(O <sub>3</sub> , CO, NO <sub>2</sub> , SO <sub>2</sub> , PM <sub>2.5</sub> ) | WARM   | 1.8%              | 0.4%              | 0.5%              | 2.6%              | 94.7%                       |
| Oxidant Gases<br>(O <sub>3</sub> , NO <sub>2</sub> , SO <sub>2</sub> )                               | COLD   | 4.5%              | 1.2%              | 2.0%              | 1.1%              | 91.2%                       |
| Secondary<br>(O <sub>3</sub> , Secondary PM <sub>2.5</sub> <sup>b</sup> )                            | COLD   | 14.4%             | 9.0%              | 5.6%              | 1.5%              | 69.5%                       |
| Traffic<br>(CO, NO <sub>2</sub> , EC)                                                                | COLD   | 9.1%              | 2.3%              | 3.0%              | 13.8%             | 71.8%                       |
| Power Plant<br>(SO <sub>2</sub> , SO <sub>4</sub> <sup>2-</sup> )                                    | COLD   | 8.4%              | 6.4%              | 5.4%              | 1.9%              | 77.9%                       |
| Criteria Pollutants<br>(O <sub>3</sub> , CO, NO <sub>2</sub> , SO <sub>2</sub> , PM <sub>2.5</sub> ) | COLD   | 1.7%              | 0.1%              | 0.2%              | 0.5%              | 97.5%                       |

Definition of Abbreviations: O<sub>3</sub>=ozone, CO=carbon monoxide, NO<sub>2</sub>=nitrogen dioxide, SO<sub>2</sub>=sulfur dioxide, PM<sub>2.5</sub>=particulate matter less than 2.5 μm in diameter, EC=elemental carbon component of PM<sub>2.5</sub>, SO<sub>4</sub><sup>2-</sup>=sulfate component of PM<sub>2.5</sub>.

<sup>a</sup> Frequencies are calculated for percentage of warm or cold season days on which the various daily pollutant values were in various quartiles of the overall-year daily pollutant distribution.

<sup>b</sup> Secondary PM<sub>2.5</sub> was calculated as the sum of the concentrations of selected PM<sub>2.5</sub> components including sulfate, nitrate, and ammonium.

**eTable 2. Primary joint effect model effect estimates, Atlanta, 1998-2004, calculated for an inter-quartile range<sup>a</sup> change in the 3-day moving average of each pollutant**

| Effect                                                                                               | Season | Model Specifications                                                           | Joint Effect Estimate  |         | Interaction p-value <sup>b</sup> |
|------------------------------------------------------------------------------------------------------|--------|--------------------------------------------------------------------------------|------------------------|---------|----------------------------------|
|                                                                                                      |        |                                                                                | RR (95% CI)            | p-value |                                  |
| Oxidant Gases<br>(O <sub>3</sub> , NO <sub>2</sub> , SO <sub>2</sub> )                               | WARM   | Model including only pollutants in joint effect, no interactions               | 1.0981 (1.0440-1.1550) | 0.0003  | NA                               |
|                                                                                                      |        | Model including only pollutants in joint effect, with first order interactions | 1.0997 (1.0432-1.1593) | 0.0004  | 0.9748                           |
| Secondary<br>(O <sub>3</sub> , Secondary PM <sub>2.5</sub> <sup>c</sup> )                            | WARM   | Model including only pollutants in joint effect, no interactions               | 1.0851 (1.0354-1.1372) | 0.0006  | NA                               |
|                                                                                                      |        | Model including only pollutants in joint effect, with first order interactions | 1.0853 (1.0281-1.1457) | 0.0031  | 0.9900                           |
| Traffic<br>(CO, NO <sub>2</sub> , EC)                                                                | WARM   | Model including only pollutants in joint effect, no interactions               | 1.1108 (1.0621-1.1616) | <0.0001 | NA                               |
|                                                                                                      |        | Model including only pollutants in joint effect, with first order interactions | 1.1332 (1.0768-1.1924) | <0.0001 | 0.4209                           |
| Power Plant<br>(SO <sub>2</sub> , SO <sub>4</sub> <sup>2-</sup> )                                    | WARM   | Model including only pollutants in joint effect, no interactions               | 1.0574 (1.0211-1.0950) | 0.0018  | NA                               |
|                                                                                                      |        | Model including only pollutants in joint effect, with first order interactions | 1.0829 (1.0374-1.1304) | 0.0003  | 0.0598                           |
| Criteria Pollutants<br>(O <sub>3</sub> , CO, NO <sub>2</sub> , SO <sub>2</sub> , PM <sub>2.5</sub> ) | WARM   | Model including only pollutants in joint effect, no interactions               | 1.1289 (1.0573-1.2053) | 0.0003  | NA                               |
|                                                                                                      |        | Model including only pollutants in joint effect, with first order interactions | 1.1540 (1.0698-1.2449) | 0.0002  | 0.3314                           |
| Oxidant Gases<br>(O <sub>3</sub> , NO <sub>2</sub> , SO <sub>2</sub> )                               | COLD   | Model including only pollutants in joint effect, no interactions               | 1.0539 (0.9851-1.1275) | 0.1274  | NA                               |
|                                                                                                      |        | Model including only pollutants in joint effect, with first order interactions | 1.0307 (0.9548-1.1126) | 0.4386  | 0.0088                           |
| Secondary<br>(O <sub>3</sub> , Secondary PM <sub>2.5</sub> <sup>c</sup> )                            | COLD   | Model including only pollutants in joint effect, no interactions               | 1.0617 (0.9918-1.1366) | 0.0850  | NA                               |
|                                                                                                      |        | Model including only pollutants in joint effect, with first order interactions | 1.0457 (0.9745-1.1222) | 0.2138  | 0.0890                           |
| Traffic<br>(CO, NO <sub>2</sub> , EC)                                                                | COLD   | Model including only pollutants in joint effect, no interactions               | 1.0194 (0.9896-1.0500) | 0.2045  | NA                               |
|                                                                                                      |        | Model including only pollutants in joint effect, with first order interactions | 1.0182 (0.9799-1.0579) | 0.3565  | 0.9941                           |
| Power Plant<br>(SO <sub>2</sub> , SO <sub>4</sub> <sup>2-</sup> )                                    | COLD   | Model including only pollutants in joint effect, no interactions               | 0.9810 (0.9398-1.0240) | 0.3803  | NA                               |
|                                                                                                      |        | Model including only pollutants in joint effect, with first order interactions | 0.9845 (0.9428-1.0280) | 0.4788  | 0.2658                           |
| Criteria Pollutants<br>(O <sub>3</sub> , CO, NO <sub>2</sub> , SO <sub>2</sub> , PM <sub>2.5</sub> ) | COLD   | Model including only pollutants in joint effect, no interactions               | 1.0397 (0.9670-1.1178) | 0.2926  | NA                               |
|                                                                                                      |        | Model including only pollutants in joint effect, with first order interactions | 0.9943 (0.9026-1.0953) | 0.9077  | 0.0002                           |

Definition of Abbreviations: O<sub>3</sub>=ozone, CO=carbon monoxide, NO<sub>2</sub>=nitrogen dioxide, SO<sub>2</sub>=sulfur dioxide, PM<sub>2.5</sub>=particulate matter less than 2.5 µm in diameter, EC=elemental carbon component of PM<sub>2.5</sub>, SO<sub>4</sub><sup>2-</sup>=sulfate component of PM<sub>2.5</sub>, RR=Rate Ratio

<sup>a</sup> For comparability with previous analyses,<sup>1</sup> the analysis used the year-round IQR during 1993-2004 for O<sub>3</sub>, NO<sub>2</sub>, CO and SO<sub>2</sub>, and during August 1, 1998-December 31, 2004 for PM<sub>2.5</sub> and PM<sub>2.5</sub> components. The IQRs used in the analysis were: O<sub>3</sub> 29.18 ppb, CO 0.66 ppm, NO<sub>2</sub> 12.87 ppb, SO<sub>2</sub> 10.51 ppb, PM<sub>2.5</sub> 9.18 µg/m<sup>3</sup>, EC 0.69 µg/m<sup>3</sup>, SO<sub>4</sub><sup>2-</sup> 3.45 µg/m<sup>3</sup>, Secondary PM<sub>2.5</sub> 4.52 µg/m<sup>3</sup>, NO<sub>x</sub> 42.70 ppb.

<sup>b</sup> Interaction test was a likelihood ratio test, testing the hypothesis that the coefficients for all interaction terms equal 0, performed using a contrast statement in SAS PROC GENMOD.

<sup>c</sup> Secondary PM<sub>2.5</sub> was calculated as the sum of the concentrations of selected PM<sub>2.5</sub> components including sulfate, nitrate, and ammonium.

**eTable 3. Single-pollutant model effect estimates, Atlanta, warm and cold seasons , 1998-2004, calculated for an inter-quartile range<sup>a</sup> change in the 3-day moving average of in each pollutant**

| Effect                                   | Season | Model Specifications   | Effect Estimate        |         |
|------------------------------------------|--------|------------------------|------------------------|---------|
|                                          |        |                        | RR (95% CI)            | p-value |
| O <sub>3</sub>                           | WARM   | Single Pollutant Model | 1.0778 (1.0308-1.1270) | 0.0010  |
| CO                                       | WARM   | Single Pollutant Model | 1.1076 (1.0597-1.1576) | 0.0000  |
| NO <sub>2</sub>                          | WARM   | Single Pollutant Model | 1.0868 (1.0536-1.1211) | 0.0000  |
| SO <sub>2</sub>                          | WARM   | Single Pollutant Model | 1.0426 (1.0112-1.0750) | 0.0074  |
| PM <sub>2.5</sub>                        | WARM   | Single Pollutant Model | 1.0430 (1.0165-1.0703) | 0.0014  |
| EC                                       | WARM   | Single Pollutant Model | 1.0401 (1.0097-1.0714) | 0.0095  |
| SO <sub>4</sub> <sup>2-</sup>            | WARM   | Single Pollutant Model | 1.0261 (1.0041-1.0487) | 0.0200  |
| Secondary PM <sub>2.5</sub> <sup>b</sup> | WARM   | Single Pollutant Model | 1.0263 (1.0049-1.0481) | 0.0159  |
| O <sub>3</sub>                           | COLD   | Single Pollutant Model | 1.0702 (1.0079-1.1364) | 0.0266  |
| CO                                       | COLD   | Single Pollutant Model | 1.0150 (0.9869-1.0439) | 0.2993  |
| NO <sub>2</sub>                          | COLD   | Single Pollutant Model | 1.0193 (0.9917-1.0478) | 0.1723  |
| SO <sub>2</sub>                          | COLD   | Single Pollutant Model | 0.9841 (0.9578-1.0111) | 0.2446  |
| PM <sub>2.5</sub>                        | COLD   | Single Pollutant Model | 1.0045 (0.9785-1.0311) | 0.7372  |
| EC                                       | COLD   | Single Pollutant Model | 1.0032 (0.9814-1.0254) | 0.7787  |
| SO <sub>4</sub> <sup>2-</sup>            | COLD   | Single Pollutant Model | 0.9907 (0.9538-1.0290) | 0.6306  |
| Secondary PM <sub>2.5</sub> <sup>b</sup> | COLD   | Single Pollutant Model | 0.9840 (0.9530-1.0160) | 0.3221  |

Definition of Abbreviations: O<sub>3</sub>=ozone, CO=carbon monoxide, NO<sub>2</sub>=nitrogen dioxide, SO<sub>2</sub>=sulfur dioxide, PM<sub>2.5</sub>=particulate matter less than 2.5 μm in diameter, EC=elemental carbon component of PM<sub>2.5</sub>, SO<sub>4</sub><sup>2-</sup>=sulfate component of PM<sub>2.5</sub>, RR=Rate Ratio

<sup>a</sup> For comparability with previous analyses,<sup>1</sup> the analysis used the year-round IQR during 1993-2004 for O<sub>3</sub>, NO<sub>2</sub>, CO and SO<sub>2</sub>, and during August 1, 1998-December 31, 2004 for PM<sub>2.5</sub> and PM<sub>2.5</sub> components. The IQRs used in the analysis were: O<sub>3</sub> 29.18 ppb, CO 0.66 ppm, NO<sub>2</sub> 12.87 ppb, SO<sub>2</sub> 10.51 ppb, PM<sub>2.5</sub> 9.18 μg/m<sup>3</sup>, EC 0.69 μg/m<sup>3</sup>, SO<sub>4</sub><sup>2-</sup> 3.45 μg/m<sup>3</sup>, Secondary PM<sub>2.5</sub> 4.52 μg/m<sup>3</sup>.

<sup>b</sup> Secondary PM<sub>2.5</sub> was calculated as the sum of the concentrations of selected PM<sub>2.5</sub> components including sulfate, nitrate, and ammonium.



**Table 4. Pollutant-specific parameter and concurrency estimates, primary models, Atlanta, 1998-2004, Warm Season**

| Effect                                                                         | Model Specifications                                                           | Pollutant*                                                       | Unit              | Coefficient per 1 unit change | p-value | Concurrency: all variables | Concurrency: pollutants only |       |
|--------------------------------------------------------------------------------|--------------------------------------------------------------------------------|------------------------------------------------------------------|-------------------|-------------------------------|---------|----------------------------|------------------------------|-------|
| O <sub>3</sub>                                                                 | Single Pollutant Model                                                         | O <sub>3</sub>                                                   | ppb               | 0.0026                        | 0.0010  | 0.874                      | NA                           |       |
| CO                                                                             | Single Pollutant Model                                                         | CO                                                               | ppm               | 0.1548                        | 0.0000  | 0.841                      | NA                           |       |
| NO <sub>2</sub>                                                                | Single Pollutant Model                                                         | NO <sub>2</sub>                                                  | ppb               | 0.0065                        | 0.0000  | 0.812                      | NA                           |       |
| SO <sub>2</sub>                                                                | Single Pollutant Model                                                         | SO <sub>2</sub>                                                  | ppb               | 0.0040                        | 0.0074  | 0.609                      | NA                           |       |
| PM <sub>2.5</sub>                                                              | Single Pollutant Model                                                         | PM <sub>2.5</sub>                                                | µg/m <sup>3</sup> | 0.0046                        | 0.0014  | 0.734                      | NA                           |       |
| EC                                                                             | Single Pollutant Model                                                         | EC                                                               | µg/m <sup>3</sup> | 0.0569                        | 0.0095  | 0.825                      | NA                           |       |
| SO <sub>4</sub> <sup>2-</sup>                                                  | Single Pollutant Model                                                         | SO <sub>4</sub> <sup>2-</sup>                                    | µg/m <sup>3</sup> | 0.0075                        | 0.0200  | 0.726                      | NA                           |       |
| Secondary PM <sub>2.5</sub> <sup>a</sup>                                       | Single Pollutant Model                                                         | Secondary PM <sub>2.5</sub> <sup>a</sup>                         | µg/m <sup>3</sup> | 0.0057                        | 0.0159  | 0.727                      | NA                           |       |
| Oxidant Gases                                                                  | Model including only pollutants in joint effect, no interactions               | O <sub>3</sub>                                                   | ppb               | 0.0003                        | 0.7949  | 0.923                      | 0.566                        |       |
|                                                                                |                                                                                | NO <sub>2</sub>                                                  | ppb               | 0.0059                        | 0.0004  | 0.901                      | 0.646                        |       |
|                                                                                |                                                                                | SO <sub>2</sub>                                                  | ppb               | 0.0010                        | 0.5495  | 0.686                      | 0.443                        |       |
|                                                                                | Model including only pollutants in joint effect, with first order interactions | O <sub>3</sub>                                                   | ppb               | 0.0006                        | 0.7216  | 0.972                      | 0.944                        |       |
|                                                                                |                                                                                | NO <sub>2</sub>                                                  | ppb               | 0.0065                        | 0.1057  | 0.985                      | 0.972                        |       |
|                                                                                |                                                                                | SO <sub>2</sub>                                                  | ppb               | -0.0010                       | 0.8756  | 0.982                      | 0.976                        |       |
|                                                                                |                                                                                | O <sub>3</sub> *NO <sub>2</sub>                                  | ppb <sup>2</sup>  | 0.0000                        | 0.7608  | 0.992                      | 0.986                        |       |
| Secondary                                                                      | Model including only pollutants in joint effect, no interactions               | O <sub>3</sub>                                                   | ppb               | 0.0026                        | 0.0091  | 0.927                      | 0.586                        |       |
|                                                                                |                                                                                | Secondary PM <sub>2.5</sub> <sup>a</sup>                         | µg/m <sup>3</sup> | 0.0014                        | 0.6247  | 0.843                      | 0.583                        |       |
|                                                                                | Model including only pollutants in joint effect, with first order interactions | O <sub>3</sub>                                                   | ppb               | 0.0026                        | 0.0621  | 0.960                      | 0.897                        |       |
|                                                                                |                                                                                | Secondary PM <sub>2.5</sub> <sup>a</sup>                         | µg/m <sup>3</sup> | 0.0015                        | 0.8375  | 0.977                      | 0.960                        |       |
|                                                                                |                                                                                | O <sub>3</sub> *Secondary PM <sub>2.5</sub> <sup>a</sup>         | ppb*              | 0.0000                        | 0.9900  | 0.987                      | 0.978                        |       |
|                                                                                | Traffic                                                                        | Model including only pollutants in joint effect, no interactions | CO                | ppm                           | 0.1151  | 0.0377                     | 0.940                        | 0.866 |
|                                                                                |                                                                                |                                                                  | NO <sub>2</sub>   | ppb                           | 0.0052  | 0.0044                     | 0.916                        | 0.777 |
| EC                                                                             |                                                                                |                                                                  | µg/m <sup>3</sup> | -0.0549                       | 0.0898  | 0.918                      | 0.839                        |       |
| Model including only pollutants in joint effect, with first order interactions |                                                                                | CO                                                               | ppm               | 0.1257                        | 0.3404  | 0.990                      | 0.984                        |       |
|                                                                                |                                                                                | NO <sub>2</sub>                                                  | ppb               | 0.0047                        | 0.2399  | 0.984                      | 0.973                        |       |
|                                                                                |                                                                                | EC                                                               | µg/m <sup>3</sup> | 0.0380                        | 0.6552  | 0.989                      | 0.981                        |       |
|                                                                                |                                                                                | CO*NO <sub>2</sub>                                               | ppm*ppb           | 0.0017                        | 0.6877  | 0.996                      | 0.994                        |       |
| Power Plant                                                                    | Model including only pollutants in joint effect, no interactions               | SO <sub>2</sub>                                                  | ppb               | 0.0033                        | 0.0320  | 0.634                      | 0.256                        |       |
|                                                                                |                                                                                | SO <sub>4</sub> <sup>2-</sup>                                    | µg/m <sup>3</sup> | 0.0060                        | 0.0667  | 0.738                      | 0.261                        |       |
|                                                                                | Model including only pollutants in joint effect, with first order interactions | SO <sub>2</sub>                                                  | ppb               | 0.0099                        | 0.0096  | 0.950                      | 0.927                        |       |
|                                                                                |                                                                                | SO <sub>4</sub> <sup>2-</sup>                                    | µg/m <sup>3</sup> | 0.0150                        | 0.0096  | 0.927                      | 0.890                        |       |
|                                                                                |                                                                                | SO <sub>2</sub> *SO <sub>4</sub> <sup>2-</sup>                   | ppb*              | -0.0010                       | 0.0602  | 0.971                      | 0.961                        |       |
|                                                                                | Criteria Pollutants                                                            | Model including only pollutants in joint effect, no interactions | O <sub>3</sub>    | ppb                           | 0.0008  | 0.5182                     | 0.953                        | 0.792 |
|                                                                                |                                                                                |                                                                  | CO                | ppm                           | 0.0854  | 0.0909                     | 0.929                        | 0.820 |
| NO <sub>2</sub>                                                                |                                                                                |                                                                  | ppb               | 0.0032                        | 0.1460  | 0.942                      | 0.864                        |       |
| SO <sub>2</sub>                                                                |                                                                                |                                                                  | ppb               | 0.0007                        | 0.6979  | 0.693                      | 0.467                        |       |
| PM <sub>2.5</sub>                                                              |                                                                                |                                                                  | µg/m <sup>3</sup> | -0.0006                       | 0.7814  | 0.900                      | 0.767                        |       |
| Model including only pollutants in joint effect, with first order interactions |                                                                                | O <sub>3</sub>                                                   | ppb               | -0.0034                       | 0.1857  | 0.989                      | 0.979                        |       |
|                                                                                |                                                                                | CO                                                               | ppm               | 0.0877                        | 0.5605  | 0.992                      | 0.988                        |       |
|                                                                                |                                                                                | NO <sub>2</sub>                                                  | ppb               | 0.0099                        | 0.1427  | 0.995                      | 0.991                        |       |
|                                                                                |                                                                                | SO <sub>2</sub>                                                  | ppb               | -0.0039                       | 0.5749  | 0.984                      | 0.978                        |       |
|                                                                                |                                                                                | PM <sub>2.5</sub>                                                | µg/m <sup>3</sup> | 0.0012                        | 0.8477  | 0.990                      | 0.985                        |       |
|                                                                                |                                                                                | O <sub>3</sub> *CO                                               | ppb*ppm           | 0.0016                        | 0.5689  | 0.996                      | 0.994                        |       |
|                                                                                |                                                                                | O <sub>3</sub> *NO <sub>2</sub>                                  | ppb <sup>2</sup>  | 0.0000                        | 0.7481  | 0.997                      | 0.996                        |       |
|                                                                                |                                                                                | O <sub>3</sub> *SO <sub>2</sub>                                  | ppb <sup>2</sup>  | 0.0002                        | 0.2309  | 0.993                      | 0.991                        |       |
|                                                                                |                                                                                | O <sub>3</sub> *PM <sub>2.5</sub>                                | ppb*              | 0.0001                        | 0.2531  | 0.996                      | 0.993                        |       |
|                                                                                |                                                                                | CO*NO <sub>2</sub>                                               | ppm*ppb           | -0.0061                       | 0.1016  | 0.994                      | 0.991                        |       |
| CO*SO <sub>2</sub>                                                             | ppm*ppb                                                                        | 0.0076                                                           | 0.2357            | 0.993                         | 0.991   |                            |                              |       |
| CO*PM <sub>2.5</sub>                                                           | ppm*                                                                           | 0.0015                                                           | 0.8420            | 0.997                         | 0.996   |                            |                              |       |
| NO <sub>2</sub> *SO <sub>2</sub>                                               | ppb <sup>2</sup>                                                               | 0.0002                                                           | 0.5174            | 0.995                         | 0.993   |                            |                              |       |
| NO <sub>2</sub> *PM <sub>2.5</sub>                                             | ppb*                                                                           | -0.0001                                                          | 0.7281            | 0.998                         | 0.997   |                            |                              |       |
| SO <sub>2</sub> *PM <sub>2.5</sub>                                             | ppb*                                                                           | -0.0008                                                          | 0.0361            | 0.994                         | 0.992   |                            |                              |       |

Abbreviations: O<sub>3</sub>=ozone, CO=carbon monoxide, NO<sub>2</sub>=nitrogen dioxide, SO<sub>2</sub>=sulfur dioxide, PM<sub>2.5</sub>=particulate matter < 2.5 µm in diameter, EC=elemental carbon component of PM<sub>2.5</sub>, SO<sub>4</sub><sup>2-</sup>=sulfate component of PM<sub>2.5</sub>, ppb=parts per billion, ppm=parts per million, µg/m<sup>3</sup>=micrograms per cubic millimeter.

<sup>a</sup>Secondary PM<sub>2.5</sub> was calculated as the sum of the concentrations of the PM<sub>2.5</sub> components sulfate, nitrate, and ammonium.

**Table 5. Pollutant-specific parameter and concurrency estimates, primary models, Atlanta, 1998-2004, Cold Season**

| Effect                                                                         | Model Specifications                                                           | Pollutant*                                                       | Unit              | Coefficient per 1 unit change | p-value | Concurrency: all variables | Concurrency: pollutants only |       |
|--------------------------------------------------------------------------------|--------------------------------------------------------------------------------|------------------------------------------------------------------|-------------------|-------------------------------|---------|----------------------------|------------------------------|-------|
| O <sub>3</sub>                                                                 | Single Pollutant Model                                                         | O <sub>3</sub>                                                   | ppb               | 0.0023                        | 0.0266  | 0.905                      | NA                           |       |
| CO                                                                             | Single Pollutant Model                                                         | CO                                                               | ppm               | 0.0225                        | 0.2993  | 0.740                      | NA                           |       |
| NO <sub>2</sub>                                                                | Single Pollutant Model                                                         | NO <sub>2</sub>                                                  | ppb               | 0.0015                        | 0.1723  | 0.740                      | NA                           |       |
| SO <sub>2</sub>                                                                | Single Pollutant Model                                                         | SO <sub>2</sub>                                                  | ppb               | -0.0015                       | 0.2446  | 0.721                      | NA                           |       |
| PM <sub>2.5</sub>                                                              | Single Pollutant Model                                                         | PM <sub>2.5</sub>                                                | µg/m <sup>3</sup> | 0.0005                        | 0.7372  | 0.711                      | NA                           |       |
| EC                                                                             | Single Pollutant Model                                                         | EC                                                               | µg/m <sup>3</sup> | 0.0046                        | 0.7787  | 0.776                      | NA                           |       |
| SO <sub>4</sub> <sup>2-</sup>                                                  | Single Pollutant Model                                                         | SO <sub>4</sub> <sup>2-</sup>                                    | µg/m <sup>3</sup> | -0.0027                       | 0.6306  | 0.748                      | NA                           |       |
| Secondary PM <sub>2.5</sub> <sup>a</sup>                                       | Single Pollutant Model                                                         | Secondary PM <sub>2.5</sub> <sup>a</sup>                         | µg/m <sup>3</sup> | -0.0036                       | 0.3221  | 0.700                      | NA                           |       |
| Oxidant Gases                                                                  | Model including only pollutants in joint effect, no interactions               | O <sub>3</sub>                                                   | ppb               | 0.0019                        | 0.0935  | 0.917                      | 0.398                        |       |
|                                                                                |                                                                                | NO <sub>2</sub>                                                  | ppb               | 0.0012                        | 0.3085  | 0.790                      | 0.531                        |       |
|                                                                                |                                                                                | SO <sub>2</sub>                                                  | ppb               | -0.0017                       | 0.2175  | 0.751                      | 0.422                        |       |
|                                                                                | Model including only pollutants in joint effect, with first order interactions | O <sub>3</sub>                                                   | ppb               | 0.0011                        | 0.6493  | 0.982                      | 0.965                        |       |
|                                                                                |                                                                                | NO <sub>2</sub>                                                  | ppb               | 0.0006                        | 0.8541  | 0.976                      | 0.964                        |       |
|                                                                                |                                                                                | SO <sub>2</sub>                                                  | ppb               | 0.0127                        | 0.0059  | 0.981                      | 0.972                        |       |
|                                                                                |                                                                                | O <sub>3</sub> *NO <sub>2</sub>                                  | ppb <sup>2</sup>  | 0.0001                        | 0.1583  | 0.990                      | 0.985                        |       |
| Secondary                                                                      | Model including only pollutants in joint effect, no interactions               | O <sub>3</sub>                                                   | ppb               | 0.0026                        | 0.0133  | 0.908                      | 0.166                        |       |
|                                                                                |                                                                                | Secondary PM <sub>2.5</sub> <sup>a</sup>                         | µg/m <sup>3</sup> | -0.0038                       | 0.2877  | 0.700                      | 0.170                        |       |
|                                                                                | Model including only pollutants in joint effect, with first order interactions | O <sub>3</sub>                                                   | ppb               | 0.0056                        | 0.0059  | 0.975                      | 0.940                        |       |
|                                                                                |                                                                                | Secondary PM <sub>2.5</sub> <sup>a</sup>                         | µg/m <sup>3</sup> | 0.0134                        | 0.2135  | 0.971                      | 0.949                        |       |
|                                                                                |                                                                                | O <sub>3</sub> *Secondary PM <sub>2.5</sub> <sup>a</sup>         | ppb*              | -0.0005                       | 0.0894  | 0.985                      | 0.975                        |       |
|                                                                                | Traffic                                                                        | Model including only pollutants in joint effect, no interactions | CO                | ppm                           | -0.0074 | 0.8466                     | 0.920                        | 0.828 |
|                                                                                |                                                                                |                                                                  | NO <sub>2</sub>   | ppb                           | 0.0028  | 0.1410                     | 0.922                        | 0.739 |
| EC                                                                             |                                                                                |                                                                  | µg/m <sup>3</sup> | -0.0180                       | 0.4414  | 0.897                      | 0.765                        |       |
| Model including only pollutants in joint effect, with first order interactions |                                                                                | CO                                                               | ppm               | 0.0154                        | 0.8940  | 0.992                      | 0.986                        |       |
|                                                                                |                                                                                | NO <sub>2</sub>                                                  | ppb               | 0.0025                        | 0.5478  | 0.984                      | 0.964                        |       |
|                                                                                |                                                                                | EC                                                               | µg/m <sup>3</sup> | -0.0356                       | 0.6753  | 0.992                      | 0.982                        |       |
|                                                                                |                                                                                | CO*NO <sub>2</sub>                                               | ppm*ppb           | -0.0004                       | 0.9117  | 0.996                      | 0.993                        |       |
| Power Plant                                                                    | Model including only pollutants in joint effect, no interactions               | SO <sub>2</sub>                                                  | ppb               | -0.0013                       | 0.3334  | 0.746                      | 0.053                        |       |
|                                                                                |                                                                                | SO <sub>4</sub> <sup>2-</sup>                                    | µg/m <sup>3</sup> | -0.0015                       | 0.7984  | 0.762                      | 0.069                        |       |
|                                                                                | Model including only pollutants in joint effect, with first order interactions | SO <sub>2</sub>                                                  | ppb               | -0.0042                       | 0.1500  | 0.950                      | 0.915                        |       |
|                                                                                |                                                                                | SO <sub>4</sub> <sup>2-</sup>                                    | µg/m <sup>3</sup> | -0.0113                       | 0.2841  | 0.933                      | 0.887                        |       |
|                                                                                |                                                                                | SO <sub>2</sub> *SO <sub>4</sub> <sup>2-</sup>                   | ppb*              | 0.0009                        | 0.2654  | 0.963                      | 0.947                        |       |
|                                                                                | Criteria Pollutants                                                            | Model including only pollutants in joint effect, no interactions | O <sub>3</sub>    | ppb                           | 0.0017  | 0.1539                     | 0.922                        | 0.456 |
|                                                                                |                                                                                |                                                                  | CO                | ppm                           | 0.0078  | 0.8306                     | 0.913                        | 0.783 |
| NO <sub>2</sub>                                                                |                                                                                |                                                                  | ppb               | 0.0022                        | 0.2942  | 0.933                      | 0.815                        |       |
| SO <sub>2</sub>                                                                |                                                                                |                                                                  | ppb               | -0.0020                       | 0.1536  | 0.755                      | 0.446                        |       |
| PM <sub>2.5</sub>                                                              |                                                                                |                                                                  | µg/m <sup>3</sup> | -0.0024                       | 0.2096  | 0.838                      | 0.642                        |       |
| Model including only pollutants in joint effect, with first order interactions |                                                                                | O <sub>3</sub>                                                   | ppb               | -0.0007                       | 0.8073  | 0.988                      | 0.977                        |       |
|                                                                                |                                                                                | CO                                                               | ppm               | 0.2354                        | 0.0833  | 0.994                      | 0.989                        |       |
|                                                                                |                                                                                | NO <sub>2</sub>                                                  | ppb               | -0.0048                       | 0.4776  | 0.994                      | 0.990                        |       |
|                                                                                |                                                                                | SO <sub>2</sub>                                                  | ppb               | 0.0093                        | 0.0818  | 0.985                      | 0.979                        |       |
|                                                                                |                                                                                | PM <sub>2.5</sub>                                                | µg/m <sup>3</sup> | -0.0076                       | 0.2588  | 0.987                      | 0.981                        |       |
|                                                                                |                                                                                | O <sub>3</sub> *CO                                               | ppb*ppm           | -0.0135                       | 0.0000  | 0.995                      | 0.991                        |       |
|                                                                                |                                                                                | O <sub>3</sub> *NO <sub>2</sub>                                  | ppb <sup>2</sup>  | 0.0004                        | 0.0008  | 0.996                      | 0.993                        |       |
|                                                                                |                                                                                | O <sub>3</sub> *SO <sub>2</sub>                                  | ppb <sup>2</sup>  | -0.0002                       | 0.0425  | 0.981                      | 0.972                        |       |
|                                                                                |                                                                                | O <sub>3</sub> *PM <sub>2.5</sub>                                | ppb*              | 0.0003                        | 0.0814  | 0.995                      | 0.992                        |       |
| Secondary PM <sub>2.5</sub> <sup>a</sup>                                       | CO*NO <sub>2</sub>                                                             | ppm*ppb                                                          | 0.0089            | 0.0128                        | 0.996   | 0.994                      |                              |       |
|                                                                                | CO*SO <sub>2</sub>                                                             | ppm*ppb                                                          | -0.0081           | 0.1094                        | 0.990   | 0.986                      |                              |       |
|                                                                                | CO*PM <sub>2.5</sub>                                                           | ppm*                                                             | 0.0043            | 0.5036                        | 0.997   | 0.994                      |                              |       |
|                                                                                | NO <sub>2</sub> *SO <sub>2</sub>                                               | ppb <sup>2</sup>                                                 | -0.0004           | 0.1216                        | 0.994   | 0.992                      |                              |       |
|                                                                                | NO <sub>2</sub> *PM <sub>2.5</sub>                                             | ppb*                                                             | -0.0008           | 0.0199                        | 0.998   | 0.996                      |                              |       |
| SO <sub>2</sub> *PM <sub>2.5</sub>                                             | ppb*                                                                           | 0.0011                                                           | 0.0075            | 0.992                         | 0.989   |                            |                              |       |

Abbreviations: O<sub>3</sub>=ozone, CO=carbon monoxide, NO<sub>2</sub>=nitrogen dioxide, SO<sub>2</sub>=sulfur dioxide, PM<sub>2.5</sub>=particulate matter < 2.5 µm in diameter, EC=elemental carbon component of PM<sub>2.5</sub>, SO<sub>4</sub><sup>2-</sup>=sulfate component of PM<sub>2.5</sub>, ppb=parts per billion, ppm=parts per million, µg/m<sup>3</sup>=micrograms per cubic millimeter.

<sup>a</sup>Secondary PM<sub>2.5</sub> was calculated as the sum of the concentrations of the PM<sub>2.5</sub> components sulfate, nitrate, and ammonium.

eTable 6. Variance-Covariance matrices for primary joint effect models, Atlanta, 1998-2004, Warm Season

|                     |                                          | O <sub>3</sub> | CO          | NO <sub>2</sub> | SO <sub>2</sub> | PM <sub>2.5</sub> | EC          | SO <sub>4</sub> <sup>2-</sup> | Secondary PM <sub>2.5</sub> <sup>a</sup> |
|---------------------|------------------------------------------|----------------|-------------|-----------------|-----------------|-------------------|-------------|-------------------------------|------------------------------------------|
| Oxidant Gases       | O <sub>3</sub>                           | 9.5546E-07     |             | -9.6111E-07     | 1.6987E-07      |                   |             |                               |                                          |
|                     | NO <sub>2</sub>                          | -9.6111E-07    |             | 2.7883E-06      | -1.0764E-06     |                   |             |                               |                                          |
|                     | SO <sub>2</sub>                          | 1.6987E-07     |             | -1.0764E-06     | 2.6953E-06      |                   |             |                               |                                          |
| Secondary           | O <sub>3</sub>                           | 9.7868E-07     |             |                 |                 |                   |             |                               | -1.6393E-06                              |
|                     | Secondary PM <sub>2.5</sub> <sup>a</sup> | -1.6393E-06    |             |                 |                 |                   |             |                               | 8.4099E-06                               |
| Traffic             | CO                                       |                | 3.0670E-03  | -4.7960E-05     |                 |                   | -8.6823E-04 |                               |                                          |
|                     | NO <sub>2</sub>                          |                | -4.7960E-05 | 3.3395E-06      |                 |                   | -1.4614E-05 |                               |                                          |
|                     | EC                                       |                | -8.6823E-04 | -1.4614E-05     |                 |                   | 1.0455E-03  |                               |                                          |
| Power Plant         | SO <sub>2</sub>                          |                |             |                 | 2.4133E-06      |                   |             | -1.0574E-06                   |                                          |
|                     | SO <sub>4</sub> <sup>2-</sup>            |                |             |                 | -1.0574E-06     |                   |             | 1.0806E-05                    |                                          |
| Criteria Pollutants | O <sub>3</sub>                           | 1.4406E-06     | 1.6754E-05  | -1.1306E-06     | 1.9821E-07      | -1.4534E-06       |             |                               |                                          |
|                     | CO                                       | 1.6754E-05     | 2.5525E-03  | -6.5342E-05     | -3.0834E-06     | -2.9971E-05       |             |                               |                                          |
|                     | NO <sub>2</sub>                          | -1.1306E-06    | -6.5342E-05 | 4.7764E-06      | -1.0238E-06     | -1.9850E-07       |             |                               |                                          |
|                     | SO <sub>2</sub>                          | 1.9821E-07     | -3.0834E-06 | -1.0238E-06     | 2.8149E-06      | -9.1418E-08       |             |                               |                                          |
|                     | PM <sub>2.5</sub>                        | -1.4534E-06    | -2.9971E-05 | -1.9850E-07     | -9.1418E-08     | 4.6962E-06        |             |                               |                                          |

Definition of Abbreviations: O<sub>3</sub>=ozone, CO=carbon monoxide, NO<sub>2</sub>=nitrogen dioxide, SO<sub>2</sub>=sulfur dioxide, PM<sub>2.5</sub>=particulate matter less than 2.5 μm in diameter, EC=elemental carbon component of PM<sub>2.5</sub>, SO<sub>4</sub><sup>2-</sup>=sulfate component of PM<sub>2.5</sub>.

<sup>a</sup>Secondary PM<sub>2.5</sub> was calculated as the sum of the concentrations of selected PM<sub>2.5</sub> components including nitrate (NO<sub>3</sub><sup>-</sup>), ammonium (NH<sub>4</sub><sup>+</sup>), and sulfate (SO<sub>4</sub><sup>2-</sup>).

**eTable 7. Variance-Covariance matrices for primary joint effect models, Atlanta, 1998-2004, Cold Season**

|                            |                                               | O <sub>3</sub> | CO          | NO <sub>2</sub> | SO <sub>2</sub> | PM <sub>2.5</sub> | EC          | SO <sub>4</sub> <sup>2-</sup> | Secondary PM <sub>2.5</sub> <sup>a</sup> |
|----------------------------|-----------------------------------------------|----------------|-------------|-----------------|-----------------|-------------------|-------------|-------------------------------|------------------------------------------|
| <b>Oxidant Gases</b>       | <b>O<sub>3</sub></b>                          | 1.2486E-06     |             | -4.5664E-07     | 2.4593E-07      |                   |             |                               |                                          |
|                            | <b>NO<sub>2</sub></b>                         | -4.5664E-07    |             | 1.4460E-06      | -4.9985E-07     |                   |             |                               |                                          |
|                            | <b>SO<sub>2</sub></b>                         | 2.4593E-07     |             | -4.9985E-07     | 1.9131E-06      |                   |             |                               |                                          |
| <b>Secondary</b>           | <b>O<sub>3</sub></b>                          | 1.1417E-06     |             |                 |                 |                   |             |                               | -1.1427E-07                              |
|                            | <b>Secondary PM<sub>2.5</sub><sup>a</sup></b> | -1.1427E-07    |             |                 |                 |                   |             |                               | 1.3045E-05                               |
| <b>Traffic</b>             | <b>CO</b>                                     |                | 1.4512E-03  | -4.5887E-05     |                 |                   | -2.7387E-04 |                               |                                          |
|                            | <b>NO<sub>2</sub></b>                         |                | -4.5887E-05 | 3.7117E-06      |                 |                   | -1.4109E-05 |                               |                                          |
|                            | <b>EC</b>                                     |                | -2.7387E-04 | -1.4109E-05     |                 |                   | 5.4888E-04  |                               |                                          |
| <b>Power Plant</b>         | <b>SO<sub>2</sub></b>                         |                |             |                 | 1.9323E-06      |                   |             | -1.7643E-06                   |                                          |
|                            | <b>SO<sub>4</sub><sup>2-</sup></b>            |                |             |                 | -1.7643E-06     |                   |             | 3.3063E-05                    |                                          |
| <b>Criteria Pollutants</b> | <b>O<sub>3</sub></b>                          | 1.3608E-06     | 5.3877E-06  | -7.1054E-07     | 2.3490E-07      | 1.2589E-08        |             |                               |                                          |
|                            | <b>CO</b>                                     | 5.3877E-06     | 1.3210E-03  | -5.3425E-05     | -1.1995E-06     | -2.2904E-06       |             |                               |                                          |
|                            | <b>NO<sub>2</sub></b>                         | -7.1054E-07    | -5.3425E-05 | 4.4393E-06      | -5.2562E-07     | -1.5992E-06       |             |                               |                                          |
|                            | <b>SO<sub>2</sub></b>                         | 2.3490E-07     | -1.1995E-06 | -5.2562E-07     | 2.0331E-06      | 9.1886E-08        |             |                               |                                          |
|                            | <b>PM<sub>2.5</sub></b>                       | 1.2589E-08     | -2.2904E-06 | -1.5992E-06     | 9.1886E-08      | 3.5909E-06        |             |                               |                                          |

Definition of Abbreviations: O<sub>3</sub>=ozone, CO=carbon monoxide, NO<sub>2</sub>=nitrogen dioxide, SO<sub>2</sub>=sulfur dioxide, PM<sub>2.5</sub>=particulate matter less than 2.5 μm in diameter, EC=elemental carbon component of PM<sub>2.5</sub>, SO<sub>4</sub><sup>2-</sup>=sulfate component of PM<sub>2.5</sub>.

<sup>a</sup>Secondary PM<sub>2.5</sub> was calculated as the sum of the concentrations of selected PM<sub>2.5</sub> components including nitrate (NO<sub>3</sub><sup>-</sup>), ammonium (NH<sub>4</sub><sup>+</sup>), and sulfate (SO<sub>4</sub><sup>2-</sup>).

**eTable 8. Sensitivity analyses for joint effect calculations, Atlanta, 1998-2004, calculated for an inter-quartile range<sup>a</sup> change in the 3-day moving average of in each pollutant**

| Effect                                                                                            | Season | Model Specifications                                                                                                                                  | Joint Effect Estimate <sup>b</sup> |         | Interaction or Non-linear term p-value <sup>c</sup> |
|---------------------------------------------------------------------------------------------------|--------|-------------------------------------------------------------------------------------------------------------------------------------------------------|------------------------------------|---------|-----------------------------------------------------|
|                                                                                                   |        |                                                                                                                                                       | RR (95% CI)                        | p-value |                                                     |
| Oxidant Gases (O <sub>3</sub> , NO <sub>2</sub> , SO <sub>2</sub> )                               | WARM   | Model including pollutants in joint effect, also controlling for CO and PM <sub>2.5</sub> , no interactions                                           | 1.0729<br>(0.9990-1.1522)          | 0.0531  | NA                                                  |
|                                                                                                   |        | Model including only pollutants in joint effect, with linear, quadratic and cubic terms for each pollutant                                            | 1.0957<br>(1.0297-1.1658)          | 0.0039  | 0.8487                                              |
| Secondary (O <sub>3</sub> , Secondary PM <sub>2.5</sub> <sup>d</sup> )                            | WARM   | Model including pollutants in joint effect, also controlling for CO, NO <sub>2</sub> , and SO <sub>2</sub> , no interactions                          | 1.0206<br>(0.9628-1.0820)          | 0.4929  | NA                                                  |
|                                                                                                   |        | Model including only pollutants in joint effects, with linear, quadratic and cubic terms for each pollutant                                           | 1.0855<br>(1.0233-1.1514)          | 0.0064  | 0.7532                                              |
| Traffic (CO, NO <sub>2</sub> , EC)                                                                | WARM   | Model including pollutants in joint effect, also controlling for O <sub>3</sub> , SO <sub>2</sub> and SO <sub>4</sub> <sup>2-</sup> , no interactions | 1.1113<br>(1.0523-1.1735)          | 0.0001  | NA                                                  |
|                                                                                                   |        | Model including only pollutants in joint effects, with linear, quadratic and cubic terms for each pollutant                                           | 1.0900<br>(1.0279-1.1559)          | 0.0040  | 0.0262                                              |
| Power Plant (SO <sub>2</sub> , SO <sub>4</sub> <sup>2-</sup> )                                    | WARM   | Model including pollutants in joint effect, also controlling for O <sub>3</sub> , CO, NO <sub>2</sub> and EC, no interactions                         | 1.0033<br>(0.9613-1.0472)          | 0.8802  | NA                                                  |
|                                                                                                   |        | Model including only pollutants in joint effects, with linear, quadratic and cubic terms for each pollutant                                           | 1.0634<br>(1.0060-1.1240)          | 0.0299  | 0.7920                                              |
| Criteria Pollutants (O <sub>3</sub> , CO, NO <sub>2</sub> , SO <sub>2</sub> , PM <sub>2.5</sub> ) | WARM   | Model including only pollutants in joint effects, with linear, quadratic and cubic terms for each pollutant                                           | 1.1149<br>(1.0322-1.2041)          | 0.0056  | 0.8846                                              |
| Oxidant Gases (O <sub>3</sub> , NO <sub>2</sub> , SO <sub>2</sub> )                               | COLD   | Model including pollutants in joint effect, also controlling for CO and PM <sub>2.5</sub> , no interactions                                           | 1.0572<br>(0.9778-1.143)           | 0.1628  | NA                                                  |
|                                                                                                   |        | Model including only pollutants in joint effect, with linear, quadratic and cubic terms for each pollutant                                            | 1.1323<br>(1.0324-1.2418)          | 0.0084  | 0.1948                                              |
| Secondary (O <sub>3</sub> , Secondary PM <sub>2.5</sub> <sup>d</sup> )                            | COLD   | Model including pollutants in joint effect, also controlling for CO, NO <sub>2</sub> , and SO <sub>2</sub> , no interactions                          | 1.0333<br>(0.9574-1.1153)          | 0.3999  | NA                                                  |
|                                                                                                   |        | Model including only pollutants in joint effects, with linear, quadratic and cubic terms for each pollutant                                           | 1.1852<br>(1.0877-1.2914)          | 0.0001  | 0.0004                                              |
| Traffic (CO, NO <sub>2</sub> , EC)                                                                | COLD   | Model including pollutants in joint effect, also controlling for O <sub>3</sub> , SO <sub>2</sub> and SO <sub>4</sub> <sup>2-</sup> , no interactions | 1.0242<br>(0.9912-1.0584)          | 0.1525  | NA                                                  |
|                                                                                                   |        | Model including only pollutants in joint effects, with linear, quadratic and cubic terms for each pollutant                                           | 1.0076<br>(0.9665-1.0505)          | 0.7216  | 0.9279                                              |
| Power Plant (SO <sub>2</sub> , SO <sub>4</sub> <sup>2-</sup> )                                    | COLD   | Model including pollutants in joint effect, also controlling for O <sub>3</sub> , CO, NO <sub>2</sub> and EC, no interactions                         | 0.9583<br>(0.9145-1.0042)          | 0.0743  | NA                                                  |
|                                                                                                   |        | Model including only pollutants in joint effects, with linear, quadratic and cubic terms for each pollutant                                           | 1.0258<br>(0.9727-1.0818)          | 0.3468  | 0.0118                                              |
| Criteria Pollutants (O <sub>3</sub> , CO, NO <sub>2</sub> , SO <sub>2</sub> , PM <sub>2.5</sub> ) | COLD   | Model including only pollutants in joint effects, with linear, quadratic and cubic terms for each pollutant                                           | 1.1322<br>(1.0252-1.2503)          | 0.0142  | 0.0295                                              |

Abbreviations: O<sub>3</sub>=ozone, CO=carbon monoxide, NO<sub>2</sub>=nitrogen dioxide, SO<sub>2</sub>=sulfur dioxide, PM<sub>2.5</sub>=particulate matter < 2.5 µm in diameter, EC=elemental carbon component of PM<sub>2.5</sub>, SO<sub>4</sub><sup>2-</sup>=sulfate component of PM<sub>2.5</sub>, RR=Rate Ratio

<sup>a</sup> For comparability with previous analyses,<sup>1</sup> the analysis used the year-round IQR during 1993-2004 for O<sub>3</sub>, NO<sub>2</sub>, CO and SO<sub>2</sub>, and during August 1, 1998-December 31, 2004 for PM<sub>2.5</sub> and PM<sub>2.5</sub> components. The IQRs used in the analysis were: O<sub>3</sub> 29.18 ppb, CO 0.66 ppm, NO<sub>2</sub> 12.87 ppb, SO<sub>2</sub> 10.51 ppb, PM<sub>2.5</sub> 9.18 µg/m<sup>3</sup>, EC 0.69 µg/m<sup>3</sup>, SO<sub>4</sub><sup>2-</sup> 3.45 µg/m<sup>3</sup>, Secondary PM<sub>2.5</sub> 4.52 µg/m<sup>3</sup>, NO<sub>x</sub> 42.7 ppb, RR=Rate Ratio

<sup>b</sup> In interaction models, the joint effects were calculated for an IQR change from the 25<sup>th</sup> percentile level to the 75<sup>th</sup> percentile level for each pollutant.

<sup>c</sup> The test for the interaction terms and non-linear terms (quadratic and cubic terms) was a likelihood ratio test, testing the hypothesis that the coefficients for all interaction terms, or all quadratic and cubic terms, equal 0, performed using a contrast statement in SAS PROC GENMOD.

<sup>d</sup> Secondary PM<sub>2.5</sub> was calculated as the sum of the concentrations of the PM<sub>2.5</sub> components sulfate, nitrate, and ammonium.

**eTable 9. Pollutant-specific parameter estimates from sensitivity analyses, Atlanta, 1998-2004, Warm Season**

| Joint Effect                                  | Model Specifications                                                                                                                                  | Pollutant <sup>a</sup>                       | Unit                              | Coefficient per 1 unit change | p-value |
|-----------------------------------------------|-------------------------------------------------------------------------------------------------------------------------------------------------------|----------------------------------------------|-----------------------------------|-------------------------------|---------|
| Oxidant Gases                                 | Model including pollutants in joint effect, also controlling for CO and PM <sub>2.5</sub> , no interactions                                           | O <sub>3</sub>                               | ppb                               | 0.0008                        | 0.5182  |
|                                               |                                                                                                                                                       | CO                                           | ppm                               | 0.0854                        | 0.0909  |
|                                               |                                                                                                                                                       | NO <sub>2</sub>                              | ppb                               | 0.0032                        | 0.1460  |
|                                               |                                                                                                                                                       | SO <sub>2</sub>                              | ppb                               | 0.0143                        | 0.6979  |
|                                               |                                                                                                                                                       | PM <sub>2.5</sub>                            | µg/m <sup>3</sup>                 | -0.0006                       | 0.7814  |
|                                               | Model including only pollutants in joint effects, with linear, quadratic and cubic terms for each pollutant                                           | O <sub>3</sub>                               | ppb                               | -0.0096                       | 0.1990  |
|                                               |                                                                                                                                                       | (O <sub>3</sub> ) <sup>2</sup>               | ppb <sup>2</sup>                  | 0.0002                        | 0.2043  |
|                                               |                                                                                                                                                       | (O <sub>3</sub> ) <sup>3</sup>               | ppb <sup>3</sup>                  | 0.0000                        | 0.2376  |
|                                               |                                                                                                                                                       | NO <sub>2</sub>                              | ppb                               | 0.0143                        | 0.2540  |
|                                               |                                                                                                                                                       | (NO <sub>2</sub> ) <sup>2</sup>              | ppb <sup>2</sup>                  | -0.0003                       | 0.5968  |
|                                               |                                                                                                                                                       | (NO <sub>2</sub> ) <sup>3</sup>              | ppb <sup>3</sup>                  | 0.0000                        | 0.6912  |
|                                               |                                                                                                                                                       | SO <sub>2</sub>                              | ppb                               | -0.0030                       | 0.6781  |
|                                               |                                                                                                                                                       | (SO <sub>2</sub> ) <sup>2</sup>              | ppb <sup>2</sup>                  | 0.0002                        | 0.6257  |
|                                               |                                                                                                                                                       | (SO <sub>2</sub> ) <sup>3</sup>              | ppb <sup>3</sup>                  | 0.0000                        | 0.6899  |
| Secondary                                     | Model including pollutants in joint effect, also controlling for CO, NO <sub>2</sub> , and SO <sub>2</sub> , no interactions                          | O <sub>3</sub>                               | ppb                               | 0.0006                        | 0.5886  |
|                                               |                                                                                                                                                       | CO                                           | ppm                               | 0.0895                        | 0.0754  |
|                                               |                                                                                                                                                       | NO <sub>2</sub>                              | ppb                               | 0.0039                        | 0.0859  |
|                                               |                                                                                                                                                       | SO <sub>2</sub>                              | ppb                               | 0.0001                        | 0.9460  |
|                                               |                                                                                                                                                       | Secondary PM <sub>2.5</sub> <sup>b</sup>     | µg/m <sup>3</sup>                 | 0.0005                        | 0.8704  |
|                                               | Model including only pollutants in joint effect, with linear, quadratic and cubic terms for each pollutant                                            | O <sub>3</sub>                               | ppb                               | -0.0074                       | 0.3461  |
|                                               |                                                                                                                                                       | (O <sub>3</sub> ) <sup>2</sup>               | ppb <sup>2</sup>                  | 0.0002                        | 0.2095  |
|                                               |                                                                                                                                                       | (O <sub>3</sub> ) <sup>3</sup>               | ppb <sup>3</sup>                  | 0.0000                        | 0.2360  |
|                                               |                                                                                                                                                       | Secondary PM <sub>2.5</sub> <sup>b</sup>     | µg/m <sup>3</sup>                 | 0.0033                        | 0.8755  |
|                                               |                                                                                                                                                       | (Secondary PM <sub>2.5</sub> ) <sup>2b</sup> | (µg/m <sup>3</sup> ) <sup>2</sup> | -0.0004                       | 0.8110  |
| (Secondary PM <sub>2.5</sub> ) <sup>3b</sup>  | (µg/m <sup>3</sup> ) <sup>3</sup>                                                                                                                     | 0.0000                                       | 0.7255                            |                               |         |
| Traffic                                       | Model including pollutants in joint effect, also controlling for O <sub>3</sub> , SO <sub>2</sub> and SO <sub>4</sub> <sup>2-</sup> , no interactions | O <sub>3</sub>                               | ppb                               | 0.0008                        | 0.4801  |
|                                               |                                                                                                                                                       | CO                                           | ppm                               | 0.1179                        | 0.0430  |
|                                               |                                                                                                                                                       | NO <sub>2</sub>                              | ppb                               | 0.0041                        | 0.0706  |
|                                               |                                                                                                                                                       | SO <sub>2</sub>                              | ppb                               | 0.0001                        | 0.9468  |
|                                               |                                                                                                                                                       | EC                                           | µg/m <sup>3</sup>                 | -0.0369                       | 0.3133  |
|                                               |                                                                                                                                                       | SO <sub>4</sub> <sup>2-</sup>                | µg/m <sup>3</sup>                 | 0.0006                        | 0.8823  |
|                                               | Model including only pollutants in joint effects, with linear, quadratic and cubic terms for each pollutant                                           | CO                                           | ppm                               | 0.7011                        | 0.0347  |
|                                               |                                                                                                                                                       | (CO) <sup>2</sup>                            | ppm <sup>2</sup>                  | -0.5832                       | 0.0520  |
|                                               |                                                                                                                                                       | (CO) <sup>3</sup>                            | ppm <sup>3</sup>                  | 0.1580                        | 0.0466  |
|                                               |                                                                                                                                                       | NO <sub>2</sub>                              | ppb                               | 0.0155                        | 0.2502  |
|                                               |                                                                                                                                                       | (NO <sub>2</sub> ) <sup>2</sup>              | ppb <sup>2</sup>                  | -0.0005                       | 0.3825  |
|                                               |                                                                                                                                                       | (NO <sub>2</sub> ) <sup>3</sup>              | ppb <sup>3</sup>                  | 0.0000                        | 0.3589  |
|                                               |                                                                                                                                                       | EC                                           | µg/m <sup>3</sup>                 | -0.2653                       | 0.0611  |
|                                               |                                                                                                                                                       | (EC) <sup>2</sup>                            | (µg/m <sup>3</sup> ) <sup>2</sup> | 0.2277                        | 0.0243  |
| (EC) <sup>3</sup>                             | (µg/m <sup>3</sup> ) <sup>3</sup>                                                                                                                     | -0.0572                                      | 0.0057                            |                               |         |
| Power Plant                                   | Model including pollutants in joint effect , also controlling for O <sub>3</sub> , CO, NO <sub>2</sub> and EC, no interactions                        | O <sub>3</sub>                               | ppb                               | 0.0008                        | 0.4801  |
|                                               |                                                                                                                                                       | CO                                           | ppm                               | 0.1179                        | 0.0430  |
|                                               |                                                                                                                                                       | NO <sub>2</sub>                              | ppb                               | 0.0041                        | 0.0706  |
|                                               |                                                                                                                                                       | SO <sub>2</sub>                              | ppb                               | 0.0001                        | 0.9468  |
|                                               |                                                                                                                                                       | EC                                           | µg/m <sup>3</sup>                 | -0.0369                       | 0.3133  |
|                                               |                                                                                                                                                       | SO <sub>4</sub> <sup>2-</sup>                | µg/m <sup>3</sup>                 | 0.0006                        | 0.8823  |
|                                               | Model including only pollutants in joint effects, with linear, quadratic and cubic terms for each pollutant                                           | SO <sub>2</sub>                              | ppb                               | 0.0104                        | 0.1276  |
|                                               |                                                                                                                                                       | (SO <sub>2</sub> ) <sup>2</sup>              | ppb <sup>2</sup>                  | -0.0004                       | 0.3559  |
|                                               |                                                                                                                                                       | (SO <sub>2</sub> ) <sup>3</sup>              | ppb <sup>3</sup>                  | 0.0000                        | 0.4906  |
|                                               |                                                                                                                                                       | SO <sub>4</sub> <sup>2-</sup>                | µg/m <sup>3</sup>                 | 0.0101                        | 0.6992  |
| (SO <sub>4</sub> <sup>2-</sup> ) <sup>2</sup> | (µg/m <sup>3</sup> ) <sup>2</sup>                                                                                                                     | -0.0008                                      | 0.8132                            |                               |         |
| (SO <sub>4</sub> <sup>2-</sup> ) <sup>3</sup> | (µg/m <sup>3</sup> ) <sup>3</sup>                                                                                                                     | 0.0000                                       | 0.7686                            |                               |         |
| Criteria Pollutants                           | Model including only pollutants in joint effects, with linear, quadratic and cubic terms for each pollutant                                           | O <sub>3</sub>                               | ppb                               | -0.0072                       | 0.3505  |
|                                               |                                                                                                                                                       | (O <sub>3</sub> ) <sup>2</sup>               | ppb <sup>2</sup>                  | 0.0002                        | 0.3141  |
|                                               |                                                                                                                                                       | (O <sub>3</sub> ) <sup>3</sup>               | ppb <sup>3</sup>                  | 0.0000                        | 0.3600  |
|                                               |                                                                                                                                                       | CO                                           | ppm                               | 0.5136                        | 0.1138  |
|                                               |                                                                                                                                                       | (CO) <sup>2</sup>                            | ppm <sup>2</sup>                  | -0.3857                       | 0.1950  |
|                                               |                                                                                                                                                       | (CO) <sup>3</sup>                            | ppm <sup>3</sup>                  | 0.1036                        | 0.2096  |
|                                               |                                                                                                                                                       | NO <sub>2</sub>                              | ppb                               | 0.0081                        | 0.5549  |
|                                               |                                                                                                                                                       | (NO <sub>2</sub> ) <sup>2</sup>              | ppb <sup>2</sup>                  | -0.0002                       | 0.7217  |
|                                               |                                                                                                                                                       | (NO <sub>2</sub> ) <sup>3</sup>              | ppb <sup>3</sup>                  | 0.0000                        | 0.7645  |
|                                               |                                                                                                                                                       | SO <sub>2</sub>                              | ppb                               | -0.0009                       | 0.9020  |
|                                               |                                                                                                                                                       | (SO <sub>2</sub> ) <sup>2</sup>              | ppb <sup>2</sup>                  | 0.0001                        | 0.7966  |
|                                               |                                                                                                                                                       | (SO <sub>2</sub> ) <sup>3</sup>              | ppb <sup>3</sup>                  | 0.0000                        | 0.7096  |
|                                               |                                                                                                                                                       | PM <sub>2.5</sub>                            | µg/m <sup>3</sup>                 | -0.0089                       | 0.6576  |
|                                               |                                                                                                                                                       | (PM <sub>2.5</sub> ) <sup>2</sup>            | (µg/m <sup>3</sup> ) <sup>2</sup> | 0.0003                        | 0.7950  |
|                                               |                                                                                                                                                       | (PM <sub>2.5</sub> ) <sup>3</sup>            | (µg/m <sup>3</sup> ) <sup>3</sup> | 0.0000                        | 0.8969  |

Abbreviations: O<sub>3</sub>=ozone, CO=carbon monoxide, NO<sub>2</sub>=nitrogen dioxide, SO<sub>2</sub>=sulfur dioxide, PM<sub>2.5</sub>=particulate matter < 2.5 µm in diameter, EC=elemental carbon component of PM<sub>2.5</sub>, SO<sub>4</sub><sup>2-</sup>=sulfate component of PM<sub>2.5</sub>, ppb=parts per billion, ppm=parts per million, µg/m<sup>3</sup>=micrograms per cubic millimeter.

<sup>a</sup> Shaded pollutants were not included in calculation of joint effect.

<sup>b</sup> Secondary PM<sub>2.5</sub> was calculated as the sum of the concentrations of the PM<sub>2.5</sub> components sulfate, nitrate, and ammonium.

**eTable 10. Pollutant-specific parameter estimates from sensitivity analyses, Atlanta, 1998-2004, Cold Season**

| Joint Effect                                  | Model Specifications                                                                                                                                  | Pollutant <sup>a</sup>                        | Unit                              | Coefficient per unit change | p-value |
|-----------------------------------------------|-------------------------------------------------------------------------------------------------------------------------------------------------------|-----------------------------------------------|-----------------------------------|-----------------------------|---------|
| Oxidant Gases                                 | Model including pollutants in joint effect, also controlling for CO and PM <sub>2.5</sub> , no interactions                                           | O <sub>3</sub>                                | ppb                               | 0.0017                      | 0.1539  |
|                                               |                                                                                                                                                       | CO                                            | ppm                               | 0.0078                      | 0.8306  |
|                                               |                                                                                                                                                       | NO <sub>2</sub>                               | ppb                               | 0.0022                      | 0.2942  |
|                                               |                                                                                                                                                       | SO <sub>2</sub>                               | ppb                               | -0.0020                     | 0.1536  |
|                                               |                                                                                                                                                       | PM <sub>2.5</sub>                             | µg/m <sup>3</sup>                 | -0.0024                     | 0.2096  |
|                                               | Model including only pollutants in joint effects, with linear, quadratic and cubic terms for each pollutant                                           | O <sub>3</sub>                                | ppb                               | -0.0160                     | 0.0491  |
|                                               |                                                                                                                                                       | (O <sub>3</sub> ) <sup>2</sup>                | ppb <sup>2</sup>                  | 0.0004                      | 0.0579  |
|                                               |                                                                                                                                                       | (O <sub>3</sub> ) <sup>3</sup>                | ppb <sup>3</sup>                  | 0.0000                      | 0.1302  |
|                                               |                                                                                                                                                       | NO <sub>2</sub>                               | ppb                               | -0.0046                     | 0.7993  |
|                                               |                                                                                                                                                       | (NO <sub>2</sub> ) <sup>2</sup>               | ppb <sup>2</sup>                  | 0.0002                      | 0.7776  |
|                                               |                                                                                                                                                       | (NO <sub>2</sub> ) <sup>3</sup>               | ppb <sup>3</sup>                  | 0.0000                      | 0.7914  |
|                                               |                                                                                                                                                       | SO <sub>2</sub>                               | ppb                               | 0.0060                      | 0.4683  |
|                                               |                                                                                                                                                       | (SO <sub>2</sub> ) <sup>2</sup>               | ppb <sup>2</sup>                  | -0.0005                     | 0.3280  |
|                                               |                                                                                                                                                       | (SO <sub>2</sub> ) <sup>3</sup>               | ppb <sup>3</sup>                  | 0.0000                      | 0.3088  |
| Secondary                                     | Model including pollutants in joint effect, also controlling for CO, NO <sub>2</sub> , and SO <sub>2</sub> , no interactions                          | O <sub>3</sub>                                | ppb                               | 0.0021                      | 0.0789  |
|                                               |                                                                                                                                                       | CO                                            | ppm                               | -0.0025                     | 0.9464  |
|                                               |                                                                                                                                                       | NO <sub>2</sub>                               | ppb                               | 0.0023                      | 0.2570  |
|                                               |                                                                                                                                                       | SO <sub>2</sub>                               | ppb                               | -0.0018                     | 0.2255  |
|                                               |                                                                                                                                                       | Secondary PM <sub>2.5</sub> <sup>b</sup>      | µg/m <sup>3</sup>                 | -0.0061                     | 0.1194  |
|                                               | Model including only pollutants in joint effect, with linear, quadratic and cubic terms for each pollutant                                            | O <sub>3</sub>                                | ppb                               | -0.0183                     | 0.0228  |
|                                               |                                                                                                                                                       | (O <sub>3</sub> ) <sup>2</sup>                | ppb <sup>2</sup>                  | 0.0005                      | 0.0226  |
|                                               |                                                                                                                                                       | (O <sub>3</sub> ) <sup>3</sup>                | ppb <sup>3</sup>                  | 0.0000                      | 0.0656  |
|                                               |                                                                                                                                                       | Secondary PM <sub>2.5</sub> <sup>b</sup>      | µg/m <sup>3</sup>                 | -0.0306                     | 0.2433  |
|                                               |                                                                                                                                                       | (Secondary PM <sub>2.5</sub> ) <sup>2b</sup>  | (µg/m <sup>3</sup> ) <sup>2</sup> | 0.0047                      | 0.1341  |
| (Secondary PM <sub>2.5</sub> ) <sup>3b</sup>  | (µg/m <sup>3</sup> ) <sup>3</sup>                                                                                                                     | -0.0002                                       | 0.0410                            |                             |         |
| Traffic                                       | Model including pollutants in joint effect, also controlling for O <sub>3</sub> , SO <sub>2</sub> and SO <sub>4</sub> <sup>2-</sup> , no interactions | O <sub>3</sub>                                | ppb                               | 0.0022                      | 0.0633  |
|                                               |                                                                                                                                                       | CO                                            | ppm                               | -0.0062                     | 0.8736  |
|                                               |                                                                                                                                                       | NO <sub>2</sub>                               | ppb                               | 0.0021                      | 0.3260  |
|                                               |                                                                                                                                                       | SO <sub>2</sub>                               | ppb                               | -0.0017                     | 0.2607  |
|                                               |                                                                                                                                                       | EC                                            | µg/m <sup>3</sup>                 | 0.0021                      | 0.9319  |
|                                               |                                                                                                                                                       | SO <sub>4</sub> <sup>2-</sup>                 | µg/m <sup>3</sup>                 | -0.0072                     | 0.2392  |
|                                               | Model including only pollutants in joint effects, with linear, quadratic and cubic terms for each pollutant                                           | CO                                            | ppm                               | 0.2945                      | 0.2740  |
|                                               |                                                                                                                                                       | (CO) <sup>2</sup>                             | ppm <sup>2</sup>                  | -0.2698                     | 0.2277  |
|                                               |                                                                                                                                                       | (CO) <sup>3</sup>                             | ppm <sup>3</sup>                  | 0.0703                      | 0.2183  |
|                                               |                                                                                                                                                       | NO <sub>2</sub>                               | ppb                               | -0.0104                     | 0.5815  |
|                                               |                                                                                                                                                       | (NO <sub>2</sub> ) <sup>2</sup>               | ppb <sup>2</sup>                  | 0.0004                      | 0.5013  |
|                                               |                                                                                                                                                       | (NO <sub>2</sub> ) <sup>3</sup>               | ppb <sup>3</sup>                  | 0.0000                      | 0.5332  |
|                                               |                                                                                                                                                       | EC                                            | µg/m <sup>3</sup>                 | -0.0730                     | 0.4805  |
|                                               |                                                                                                                                                       | (EC) <sup>2</sup>                             | (µg/m <sup>3</sup> ) <sup>2</sup> | 0.0327                      | 0.5735  |
| (EC) <sup>3</sup>                             | (µg/m <sup>3</sup> ) <sup>3</sup>                                                                                                                     | -0.0046                                       | 0.6078                            |                             |         |
| Power Plant                                   | Model including pollutants in joint effect , also controlling for O <sub>3</sub> , CO, NO <sub>2</sub> and EC, no interactions                        | O <sub>3</sub>                                | ppb                               | 0.0022                      | 0.0633  |
|                                               |                                                                                                                                                       | CO                                            | ppm                               | -0.0062                     | 0.8736  |
|                                               |                                                                                                                                                       | NO <sub>2</sub>                               | ppb                               | 0.0021                      | 0.3260  |
|                                               |                                                                                                                                                       | SO <sub>2</sub>                               | ppb                               | -0.0017                     | 0.2607  |
|                                               |                                                                                                                                                       | EC                                            | µg/m <sup>3</sup>                 | 0.0021                      | 0.9319  |
|                                               |                                                                                                                                                       | SO <sub>4</sub> <sup>2-</sup>                 | µg/m <sup>3</sup>                 | -0.0072                     | 0.2392  |
|                                               | Model including only pollutants in joint effects, with linear, quadratic and cubic terms for each pollutant                                           | SO <sub>2</sub>                               | ppb                               | 0.0100                      | 0.2223  |
|                                               |                                                                                                                                                       | (SO <sub>2</sub> ) <sup>2</sup>               | ppb <sup>2</sup>                  | -0.0008                     | 0.1487  |
|                                               |                                                                                                                                                       | (SO <sub>2</sub> ) <sup>3</sup>               | ppb <sup>3</sup>                  | 0.0000                      | 0.1641  |
|                                               |                                                                                                                                                       | SO <sub>4</sub> <sup>2-</sup>                 | µg/m <sup>3</sup>                 | -0.0404                     | 0.2318  |
|                                               |                                                                                                                                                       | (SO <sub>4</sub> <sup>2-</sup> ) <sup>2</sup> | (µg/m <sup>3</sup> ) <sup>2</sup> | 0.0109                      | 0.0846  |
| (SO <sub>4</sub> <sup>2-</sup> ) <sup>3</sup> | (µg/m <sup>3</sup> ) <sup>3</sup>                                                                                                                     | -0.0007                                       | 0.0225                            |                             |         |
| Criteria Pollutants                           | Model including only pollutants in joint effects, with linear, quadratic and cubic terms for each pollutant                                           | O <sub>3</sub>                                | ppb                               | -0.0172                     | 0.0362  |
|                                               |                                                                                                                                                       | (O <sub>3</sub> ) <sup>2</sup>                | ppb <sup>2</sup>                  | 0.0005                      | 0.0428  |
|                                               |                                                                                                                                                       | (O <sub>3</sub> ) <sup>3</sup>                | ppb <sup>3</sup>                  | 0.0000                      | 0.0917  |
|                                               |                                                                                                                                                       | CO                                            | ppm                               | 0.3685                      | 0.1537  |
|                                               |                                                                                                                                                       | (CO) <sup>2</sup>                             | ppm <sup>2</sup>                  | -0.3269                     | 0.1305  |
|                                               |                                                                                                                                                       | (CO) <sup>3</sup>                             | ppm <sup>3</sup>                  | 0.0838                      | 0.1326  |
|                                               |                                                                                                                                                       | NO <sub>2</sub>                               | ppb                               | -0.0132                     | 0.4931  |
|                                               |                                                                                                                                                       | (NO <sub>2</sub> ) <sup>2</sup>               | ppb <sup>2</sup>                  | 0.0005                      | 0.4662  |
|                                               |                                                                                                                                                       | (NO <sub>2</sub> ) <sup>3</sup>               | ppb <sup>3</sup>                  | 0.0000                      | 0.5101  |
|                                               |                                                                                                                                                       | SO <sub>2</sub>                               | ppb                               | 0.0114                      | 0.1800  |
|                                               |                                                                                                                                                       | (SO <sub>2</sub> ) <sup>2</sup>               | ppb <sup>2</sup>                  | -0.0010                     | 0.0935  |
|                                               |                                                                                                                                                       | (SO <sub>2</sub> ) <sup>3</sup>               | ppb <sup>3</sup>                  | 0.0000                      | 0.0847  |
|                                               |                                                                                                                                                       | PM <sub>2.5</sub>                             | µg/m <sup>3</sup>                 | -0.0253                     | 0.0625  |
|                                               |                                                                                                                                                       | (PM <sub>2.5</sub> ) <sup>2</sup>             | (µg/m <sup>3</sup> ) <sup>2</sup> | 0.0013                      | 0.0374  |
|                                               |                                                                                                                                                       | (PM <sub>2.5</sub> ) <sup>3</sup>             | (µg/m <sup>3</sup> ) <sup>3</sup> | 0.0000                      | 0.0168  |

Abbreviations: O<sub>3</sub>=ozone, CO=carbon monoxide, NO<sub>2</sub>=nitrogen dioxide, SO<sub>2</sub>=sulfur dioxide, PM<sub>2.5</sub>=particulate matter < 2.5 µm in diameter, EC=elemental carbon component of PM<sub>2.5</sub>, SO<sub>4</sub><sup>2-</sup>=sulfate component of PM<sub>2.5</sub>, ppb=parts per billion, ppm=parts per million, µg/m<sup>3</sup>=micrograms per cubic millimeter.

<sup>a</sup> Shaded pollutants were not included in calculation of joint effect.

<sup>b</sup> Secondary PM<sub>2.5</sub> was calculated as the sum of the concentrations of the PM<sub>2.5</sub> components sulfate, nitrate, and ammonium.

**eFigure 1. Rate ratios for joint effects from multipollutant models, evaluated for various specific IQR increments in each pollutant, Warm Season.** Rate ratios are shown in red for the oxidant pollutant combination, blue for the secondary pollutant combination, green for the traffic pollutant combination, purple for the power plant pollutant combination, and black for the criteria pollutant combination. For each combination of pollutants, joint effect rate ratios from the primary multipollutant models, which had linear pollutant terms and no interactions (“Primary”, circle markers), are followed by multipollutant models with linear pollutant terms and first order interactions between pollutants, with IQR changes evaluated starting at the 15<sup>th</sup>, 25<sup>th</sup>, and 35<sup>th</sup> percentiles for each pollutant (“Interaction”, triangle markers); and multipollutant models with linear, quadratic and cubic pollutant terms and no interactions, with IQR changes evaluated starting at the 15<sup>th</sup>, 25<sup>th</sup>, and 35<sup>th</sup> percentiles for each pollutant (“Non-linear”, diamond markers). For comparability with previous analyses,<sup>1</sup> the analysis used the year-round IQR during 1993-2004 for O<sub>3</sub>, NO<sub>2</sub>, CO and SO<sub>2</sub>, and during August 1, 1998-December 31, 2004 for PM<sub>2.5</sub> and PM<sub>2.5</sub> components. The IQRs used in the analysis were: O<sub>3</sub> 29.18 ppb, CO 0.66 ppm, NO<sub>2</sub> 12.87 ppb, SO<sub>2</sub> 10.51 ppb, PM<sub>2.5</sub> 9.18 µg/m<sup>3</sup>, EC 0.69 µg/m<sup>3</sup>, SO<sub>4</sub><sup>2-</sup> 3.45 µg/m<sup>3</sup>, Secondary PM<sub>2.5</sub> 4.52 µg/m<sup>3</sup>.

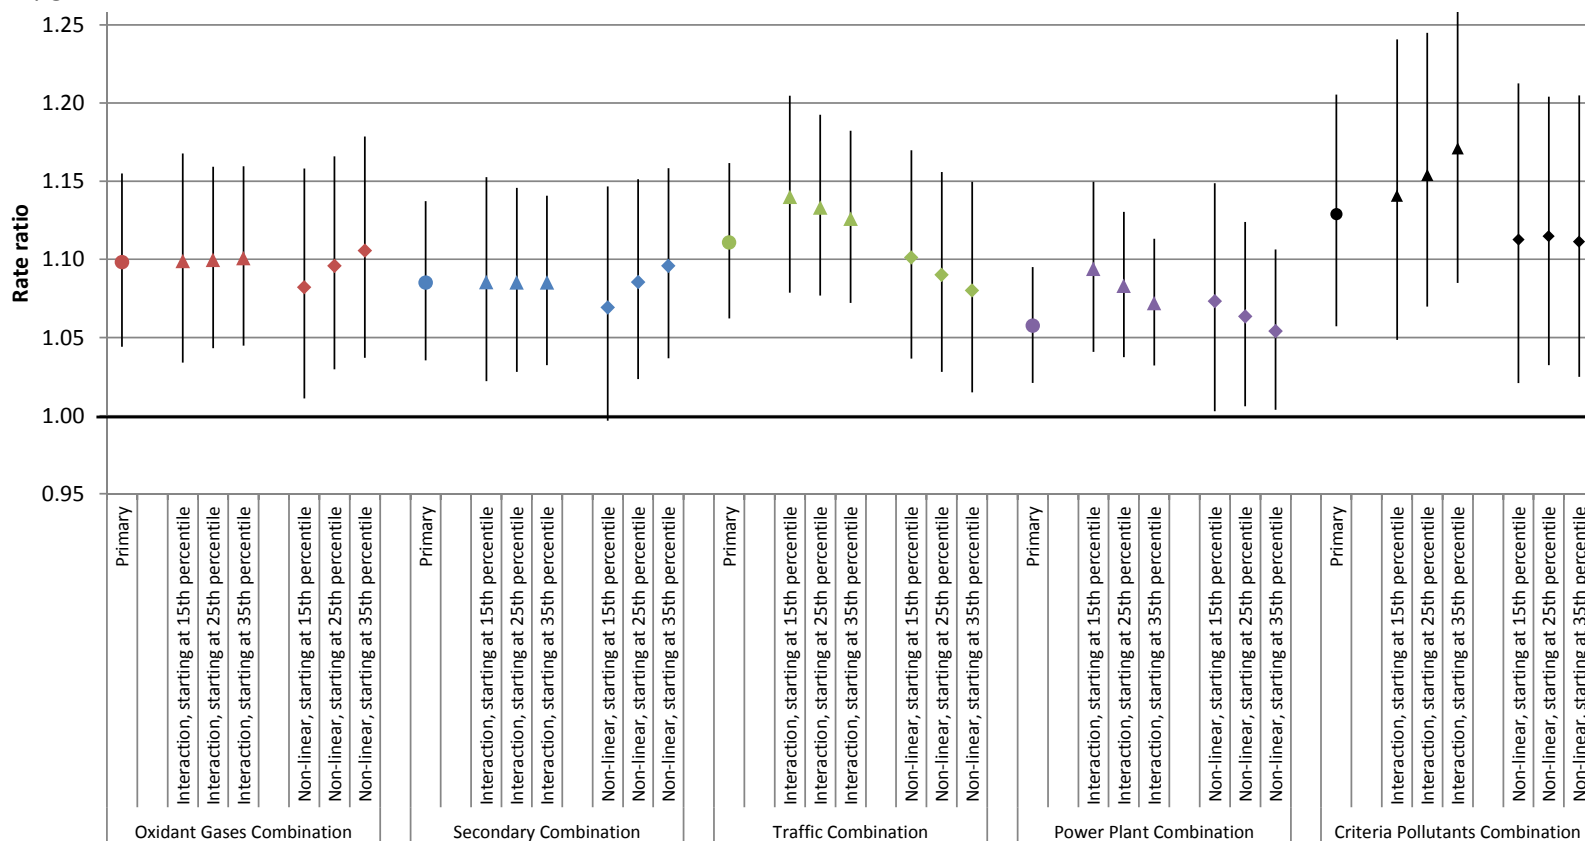



**eFigure 2. Rate ratios for joint effects from multipollutant models, evaluated for various specific IQR increments in each pollutant, Cold Season.** Rate ratios are shown in red for the oxidant pollutant combination, blue for the secondary pollutant combination, green for the traffic pollutant combination, purple for the power plant pollutant combination, and black for the criteria pollutant combination. For each combination of pollutants, joint effect rate ratios from the primary multipollutant models, which had linear pollutant terms and no interactions (“Primary”, circle markers), are followed by multipollutant models with linear pollutant terms and first order interactions between pollutants, with IQR changes evaluated starting at the 15<sup>th</sup>, 25<sup>th</sup>, and 35<sup>th</sup> percentiles for each pollutant (“Interaction”, triangle markers); and multipollutant models with linear, quadratic and cubic pollutant terms and no interactions, with IQR changes evaluated starting at the 15<sup>th</sup>, 25<sup>th</sup>, and 35<sup>th</sup> percentiles for each pollutant (“Non-linear”, diamond markers). For comparability with previous analyses,<sup>1</sup> the analysis used the year-round IQR during 1993-2004 for O<sub>3</sub>, NO<sub>2</sub>, CO and SO<sub>2</sub>, and during August 1, 1998-December 31, 2004 for PM<sub>2.5</sub> and PM<sub>2.5</sub> components. The IQRs used in the analysis were: O<sub>3</sub> 29.18 ppb, CO 0.66 ppm, NO<sub>2</sub> 12.87 ppb, SO<sub>2</sub> 10.51 ppb, PM<sub>2.5</sub> 9.18 µg/m<sup>3</sup>, EC 0.69 µg/m<sup>3</sup>, SO<sub>4</sub><sup>2-</sup> 3.45 µg/m<sup>3</sup>, Secondary PM<sub>2.5</sub> 4.52 µg/m<sup>3</sup>.

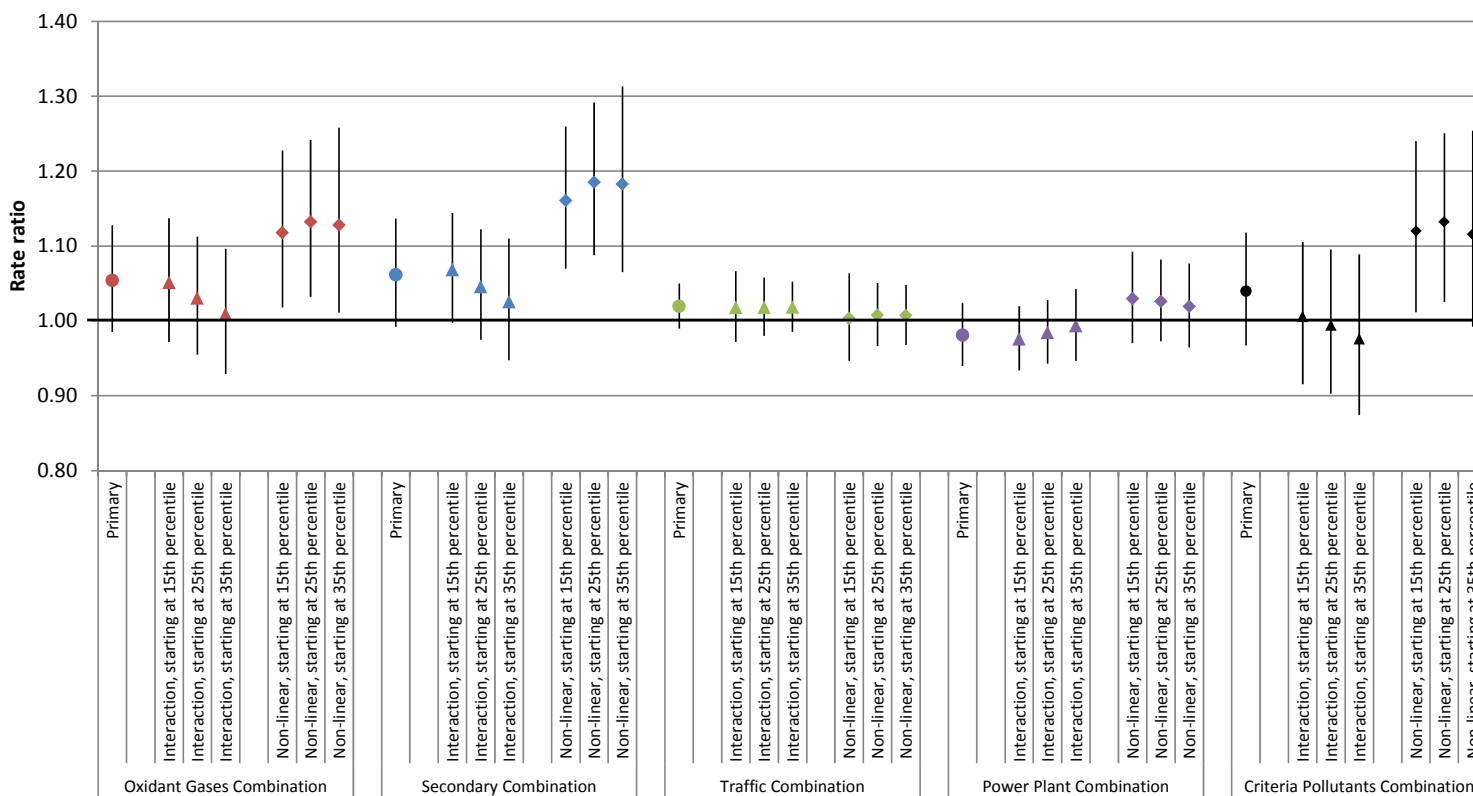

eFigure 3. Rate ratios per changes in the concentration of each pollutant from the 25<sup>th</sup> percentile to various specified percentiles based on results of joint effect models with and without non-linear terms (quadratic and cubic pollutant terms), for selected pollutant combinations, Atlanta, 1998-2004, cold season.

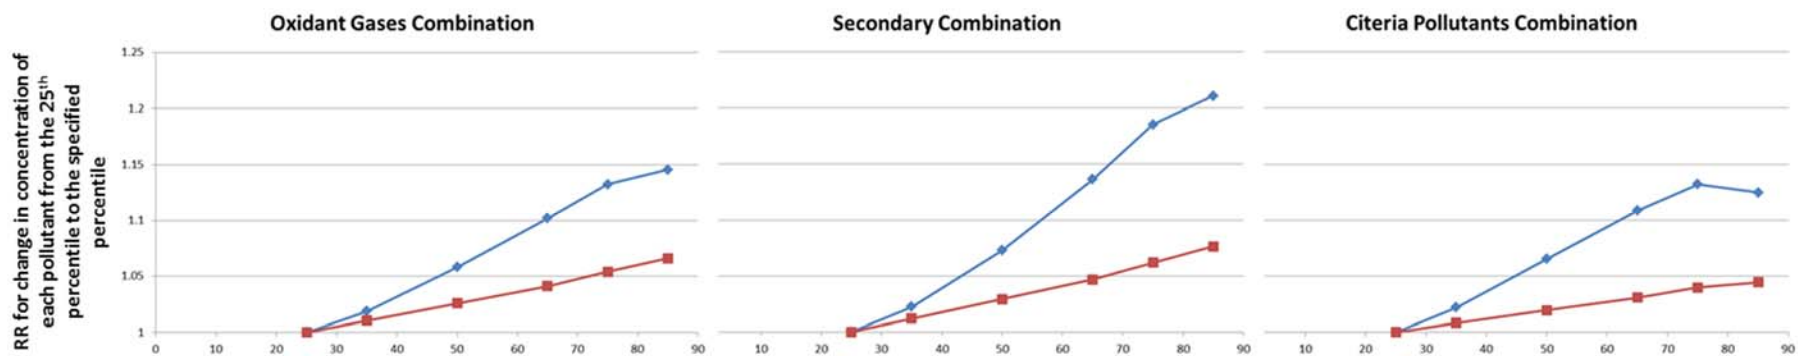

Percentile of each pollutant distribution (absolute concentrations for the percentiles for each pollutant are listed below)

|                                    |                                   | With Non-linear terms |       |       |       |       |       | Only linear terms |       |       |       |       |       |       |       |       |       |       |       |
|------------------------------------|-----------------------------------|-----------------------|-------|-------|-------|-------|-------|-------------------|-------|-------|-------|-------|-------|-------|-------|-------|-------|-------|-------|
| Percentile                         |                                   | 25                    | 35    | 50    | 65    | 75    | 85    | 25                | 35    | 50    | 65    | 75    | 85    | 25    | 35    | 50    | 65    | 75    | 85    |
| Absolute pollutant concentrations* | O3 (ppb)                          | 30.10                 | 35.44 | 43.55 | 52.02 | 59.27 | 67.44 | 30.10             | 35.44 | 43.55 | 52.02 | 59.27 | 67.44 | 30.10 | 35.44 | 43.55 | 52.02 | 59.27 | 67.44 |
|                                    | CO (ppb)                          |                       |       |       |       |       |       |                   |       |       |       |       |       | 0.54  | 0.63  | 0.78  | 0.99  | 1.19  | 1.45  |
|                                    | NO2 (ppb)                         | 16.29                 | 18.68 | 22.04 | 26.04 | 29.16 | 32.89 | 16.29             | 18.68 | 22.04 | 26.04 | 29.16 | 32.89 | 16.29 | 18.68 | 22.04 | 26.04 | 29.16 | 32.89 |
|                                    | SO2 (ppb)                         | 4.03                  | 5.49  | 8.00  | 11.45 | 14.54 | 19.48 | 4.03              | 5.49  | 8.00  | 11.45 | 14.54 | 19.48 | 4.03  | 5.49  | 8.00  | 11.45 | 14.54 | 19.48 |
|                                    | PM2.5 (µg/m <sup>3</sup> )        |                       |       |       |       |       |       |                   |       |       |       |       |       | 10.96 | 12.53 | 14.97 | 17.71 | 20.14 | 24.01 |
|                                    | Secondary PM (µg/m <sup>3</sup> ) |                       |       |       |       |       |       | 4.26              | 4.91  | 6.05  | 7.48  | 8.77  | 10.82 |       |       |       |       |       |       |

\*For comparability with previous analyses,<sup>1</sup> the percentiles were based on the year-round distribution during 1993-2004 for O3, NO2, CO and SO2, and during August 1, 1998-December 31, 2004 for PM2.5 and PM2.5 components.

## References

1. Strickland MJ, Darrow LA, Klein M, et al. Short-term Associations between Ambient Air Pollutants and Pediatric Asthma Emergency Department Visits. *Am J Respir Crit Care Med* 2010;182:307-16.
